# Supplementary material
Source: ML conference proceedings conference paper supplement (https://openreview.net/forum?id=NoB8YgRuoFU)
Supplement: supplementary_material [file Conf_scores_flight_delay_summary.xlsx]

## Sheet: Sheet1
	Rank 1	Rank 2	Rank 3	Rank 4
PI3NN (OOD)	[0.24±0.05]	[0.32±0.09]	[0.72±0.22]	[0.92±0.24]
PI3NN (No OOD)	[0.72±0.32]	[0.79±0.32]	[0.88±0.27]	[0.90±0.26]
QD	[0.89±0.24]	[0.90±0.24]	[0.92±0.16]	[0.83±0.14]
DER	[0.98±0.13]	[1.00±0.01]	[1.00±0.00]	[1.00±0.01]
PIVEN	[0.83±0.23]	[0.87±0.21]	[0.99±0.04]	[0.99±0.03]
SQR	[0.98±0.06]	[0.96±1.41]	[0.97±0.09]	[0.94±0.10]
