# Supplementary material
Source: ML conference proceedings conference paper supplement (https://openreview.net/forum?id=NoB8YgRuoFU)
Supplement: supplementary_material [file UCI_best_PICP_MPIW.xlsx]

## Sheet: Sheet1
	Note: the MPIW results for PI3NN, QD, DER and PIVEN are normalized by y_range like SQR does
														y_range
			data splitting seed: 1											data_name	split_seed	y_range
	f													boston	1	4.92532
			Boston	Concrete	Energy	Kin8nm	Naval	Power	Protein	Wine	Yacht			boston	2	4.86553
	PI3NN	Best PICP	0.94	0.95	0.95	0.95	0.95	0.95	0.95	0.96	0.94			boston	3	4.85877
		MPIW	0.27	0.31	0.17	0.27	0.15	0.2	0.82	0.47	0.05			concrete	1	4.76264
	QD	Best PICP	0.96	0.94	0.91	0.93	0.95	0.95	0.95	0.95	0.94			concrete	2	4.75665
		MPIW	0.25	0.22	0.21	0.44	0.97	0.2	0.75	0.39	0.15			concrete	3	4.83591
	PIVEN	Best PICP	0.94	0.94	0.9	0.91	0.95	0.95	0.93	0.91	0.94			energy	1	3.92849
		MPIW	0.31	0.2	0.18	0.18	0.28	0.19	0.61	0.29	0.05			energy	2	3.89172
	SQR	Best PICP	0.94	0.95	0.96	0.95	0.95	0.95	0.95	0.95	0.94			energy	3	3.89182
		MPIW	0.54	0.64	0.54	0.64	0.99	0.55	0.83	0.52	0.66			kin8nm	1	5.37872
	DER	Best PICP	0.9	1	0.95	1	1	1	0.98	0.98	0.97			kin8nm	2	5.39059
		MPIW	0.25	315.76	3.68	727.26	1174.5	741.37	3.18	0.72	0.06			kin8nm	3	5.38277
			data splitting seed: 2											naval	1	3.33758
														naval	2	3.33126
			Boston	Concrete	Energy	Kin8nm	Naval	Power	Protein	Wine	Yacht			naval	3	3.34053
	PI3NN	Best PICP	0.94	0.95	0.95	0.94	0.95	0.95	0.95	0.94	0.94			power	1	4.43209
		MPIW	0.26	0.32	0.26	0.27	0.16	0.33	0.81	0.5	0.05			power	2	4.4233
	QD	Best PICP	0.94	0.95	0.95	0.94	0.95	0.95	0.95	0.94	0.94			power	3	4.42204
		MPIW	0.23	0.19	0.23	0.41	0.97	0.2	0.75	0.42	0.15			protein	1	3.43266
	PIVEN	Best PICP	0.94	0.94	0.91	0.91	0.95	0.95	0.94	0.91	0.94			protein	2	3.42835
		MPIW	0.22	0.19	0.17	0.18	0.27	0.19	0.62	0.32	0.05			protein	3	3.43148
	SQR	Best PICP	0.94	0.95	0.96	0.95	0.95	0.95	0.95	0.95	0.94			wine	1	6.11319
		MPIW	0.54	0.64	0.54	0.64	0.99	0.55	0.83	0.52	0.66			wine	2	6.11439
	DER	Best PICP	0.94	1	0.95	1	1	1	1	0.98	0.87			wine	3	6.15616
		MPIW	0.27	240.8	66.16	725.13	1176.73	712.45	3.61	0.72	0.06			yacht	1	4.0712
			data splitting seed: 3											yacht	2	4.07194
														yacht	3	4.1425
			Boston	Concrete	Energy	Kin8nm	Naval	Power	Protein	Wine	Yacht
	PI3NN	Best PICP	0.94	0.95	0.95	0.95	0.95	0.95	0.95	0.94	0.94
		MPIW	0.26	0.39	0.22	0.26	0.15	0.28	0.82	0.49	0.08
	QD	Best PICP	0.94	0.9	0.95	0.95	0.95	0.95	0.95	0.92	0.94
		MPIW	0.24	0.21	0.19	0.44	0.97	0.18	0.75	0.4	0.15
	PIVEN	Best PICP	0.92	0.87	0.94	0.91	0.95	0.95	0.93	0.88	0.94
		MPIW	0.24	0.17	0.13	0.18	0.25	0.18	0.62	0.29	0.05
	SQR	Best PICP	0.94	0.95	0.96	0.95	0.95	0.95	0.95	0.95	0.94
		MPIW	0.54	0.64	0.54	0.64	0.99	0.55	0.83	0.52	0.66
	DER	Best PICP	0.92	1	0.96	1	1	1	0.99	0.97	0.94
		MPIW	0.21	191.62	86.28	727.56	1173.47	704.84	3.24	0.65	0.06

## Sheet: y_range
data_name	split_seed	y_range
boston	1	4.92532
boston	2	4.86553
boston	3	4.85877
concrete	1	4.76264
concrete	2	4.75665
concrete	3	4.83591
energy	1	3.92849
energy	2	3.89172
energy	3	3.89182
kin8nm	1	5.37872
kin8nm	2	5.39059
kin8nm	3	5.38277
naval	1	3.33758
naval	2	3.33126
naval	3	3.34053
power	1	4.43209
power	2	4.4233
power	3	4.42204
protein	1	3.43266
protein	2	3.42835
protein	3	3.43148
wine	1	6.11319
wine	2	6.11439
wine	3	6.15616
yacht	1	4.0712
yacht	2	4.07194
yacht	3	4.1425
