# Supplementary material
Source: ML conference proceedings conference paper supplement (https://openreview.net/forum?id=NoB8YgRuoFU)

./figs/toy/evidence\_reg\_1\_layers\_100\_neurons.pdf

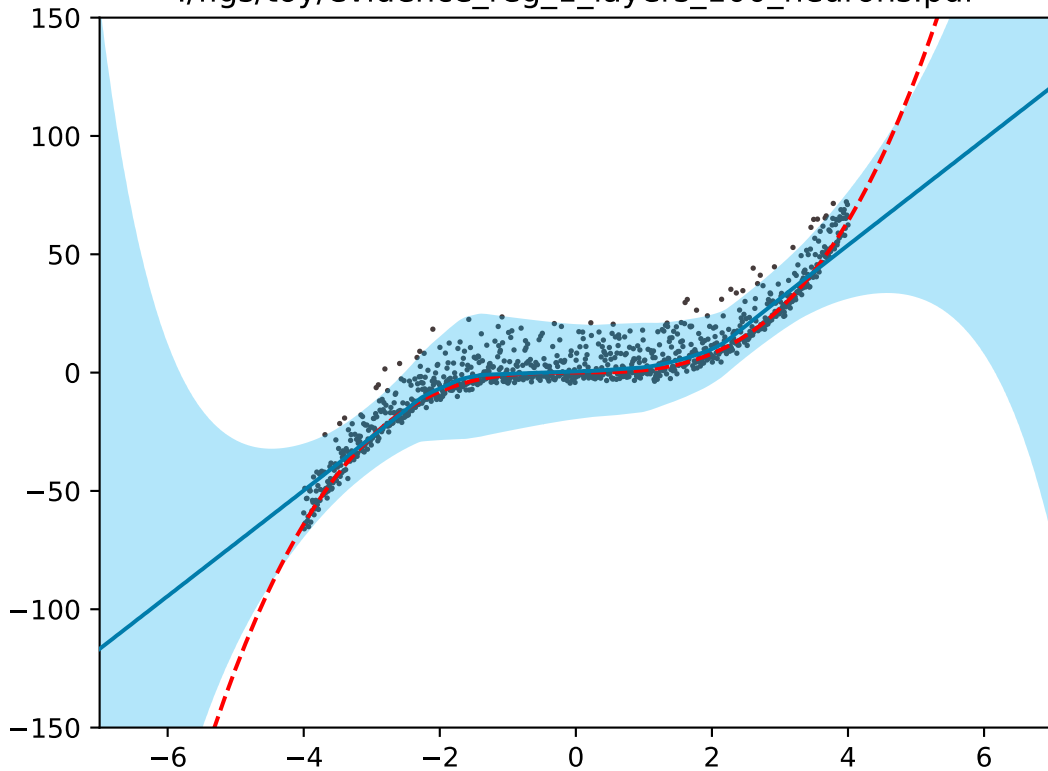

Supplement: supplementary_material [file attachment]
